# Supplementary material
Source: PubMed Central journal article supplement (PMC4091676)
Supplement: NIHMS587566-supplement-suppl_material.pdf [file NIHMS587566-supplement-suppl_material.pdf]

## Online supplemental material

### Data analysis.

Linear mixed-effects modeling was applied to ACC and RT measures to address the clustered nature of the data, with responses (level-1) nested within subjects (level-2). Mixed-effects models allowed us to examine variability at each level as well as effects and interactions within and across levels. The nested structure of the data further implied that observations at level-1 were not independent, as they were related to specific level-2 units. The mixed-effects model captured this dependency by adding a random effect for each level-2 unit, which represents the deviation of each level-2 unit's average from the overall mean (Raudenbush & Bryk, 2002).

Model building followed a bottom up theory-guided approach, starting with level-1 predictors. A model comparison framework was used to contrast alternative models that were progressively more complex. This approach is preferable to significance tests of individual parameters in arriving at correct statistical inferences (e.g., Bliese & Ployhart, 2002). The Likelihood Ratio (LR) test and the Akaike Information Criterion (AIC) were used to compare the fit of competing models.

Positive skewness was often noted for RT and negative skewness for accuracy scores. Modeling with transformed data, however, did not change the patterns of effects and interactions, therefore untransformed scores were used for easier meaningful interpretation of the estimates.

Univariate outliers were trimmed following a two-step procedure: first, on the basis of visual inspection of the data, we established upper and lower criteria and replaced values beyond these criteria with either minimum or maximum values of the distribution. Second, values beyond 3 SD, as computed for each task and each participant, were replaced with the minimum or maximum value of the distribution. Overall, no more than 2.5% of the observations were replaced. Residuals were also inspected during the modeling process. Data were analyzed with Stata software (StataCorp, 2011), using the function `xtmixed` and Maximum Likelihood (ML) for parameter estimation.

### References

- Bliese, P. D., & Ployhart, R. E. (2002). Growth modeling using random coefficient models: Model building, testing, and illustrations. *Organizational Research Methods, 5*(4), 362-387.
- Raudenbush, S. W., & Bryk, A. S. (2002). *Hierarchical linear models: Applications and data analysis methods* (2nd ed.). Thousand Oaks, CA: Sage Publications.
- StataCorp. (2011). *Stata Statistical Software: Release 12*. College Station, TX: StataCorp LP.

**Table s-1.** Descriptive statistics for Accuracy and Reaction Time data for Baseline and interference conditions by group.

| Variable           | SLI (n=22)    | TLD-A (n=22)  | TLD-L (n=22) |
|--------------------|---------------|---------------|--------------|
| Baseline           |               |               |              |
| Accuracy           | 0.85(0.09)    | 0.89(0.05)    | 0.79(0.12)   |
| Reaction Time (ms) | 1441.8(249.2) | 1181.1(270.4) | 1624(212)    |
| Interference       |               |               |              |
| Accuracy           | 0.76(0.11)    | 0.81(0.07)    | 0.76(0.12)   |
| Reaction Time (ms) | 1453.6(251.3) | 1306.1(344.5) | 1625.9(194)  |

*Note.* Mean(SD).

**Table s-2.** Descriptive statistics for Accuracy and Reaction Time data by repetition number and group.

| Repetition         | SLI (n=22) | TLD-A (n=22) | TLD-L (n=22) |
|--------------------|------------|--------------|--------------|
| Accuracy           |            |              |              |
| 0                  | 0.84(.13)  | 0.85(.13)    | 0.77(.23)    |
| 1                  | 0.86(.14)  | 0.91(.09)    | 0.85(.15)    |
| 2                  | 0.85(.14)  | 0.91(.09)    | 0.89(.13)    |
| 3                  | 0.90(.12)  | 0.91(.12)    | 0.81(.19)    |
| Reaction Time (ms) |            |              |              |
| 0                  | 1262(290)  | 1142(254)    | 1234(252)    |
| 1                  | 1210(266)  | 1078(309)    | 1329(273)    |
| 2                  | 1195(237)  | 986(230)     | 1163(153)    |
| 3                  | 1146(216)  | 1048(274)    | 1221(232)    |

*Note.* Mean(SD). Repetition 0 represents the item's first appearance, 1 represents its second appearance, 2 represents its third appearance, and 3 represents the item's fourth appearance (third repetition).

**Table s-3.** Descriptive statistics for Accuracy and Reaction Time data for repeated and post repetition items.

| Variable                      | SLI (n=22)     | TLD-A (n=22)   | TLD-L (n=22)   | Total (n=66)  |
|-------------------------------|----------------|----------------|----------------|---------------|
| Original scale                |                |                |                |               |
| rep ACC                       | 0.864(0.135)   | 0.897(0.113)   | 0.829(0.179)   | 0.863(0.147)  |
| rep RT                        | 1203.7(253.08) | 1063.9(269.83) | 1236.9(235.9)  | 1168.2(263.3) |
| arep ACC                      | 0.847(0.163)   | 0.928(0.11)    | 0.812(0.186)   | 0.862(0.163)  |
| arep RT                       | 1287.7(345.57) | 1117.8(294.43) | 1312.1(250.98) | 1239.2(310.7) |
| Rescaled ( $x - x[at\ r=0]$ ) |                |                |                |               |
| rep_r ACC                     | 0.024(0.132)   | 0.05(0.118)    | 0.057(0.171)   | 0.044(0.142)  |
| rep_r RT                      | -58.67(250.4)  | -78.77(175.98) | 2.97(244.82)   | -44.82(228.1) |
| arep_r ACC                    | -0.099(0.167)  | 0.058(0.139)   | -0.061(0.14)   | -0.034(0.163) |
| arep_r RT                     | 45.82(292.47)  | 91.62(186.32)  | 66.13(243.81)  | 67.86(244.53) |

*Note.* Mean(SD). rep = repeated items; arep = post repetition items. The rescaled variables were computed by subtracting Baseline performance ( $r = 0$ ) from performance at repetitions 1, 2, and 3, with resulting variables indexing the difference between performance on each repetition compared to Baseline.

**Table s-4.** Interference effect: Results of linear mixed-effects model comparison for performance accuracy. Best fitting model in bold.

| Model            | Fixed effects                                                   | Deviance       | df       | AIC <sup>b</sup> | LR test <sup>a</sup>    |                |             |
|------------------|-----------------------------------------------------------------|----------------|----------|------------------|-------------------------|----------------|-------------|
|                  |                                                                 |                |          |                  | Comparison <sup>c</sup> | $\chi^2(df)$   | p           |
| ma0 <sup>d</sup> |                                                                 | -239.43        | 3        | -233.43          | –                       | –              | –           |
| ma1a             | Interf                                                          | -272.39        | 4        | -264.39          | ma0-ma1a                | 32.96(1)       | <.001       |
| ma2a             | Interf, nvIQ, Vocab                                             | -283.1         | 6        | -271.1           | ma1a-ma2a               | 10.71(2)       | 0.004       |
| ma2b             | Interf, nvIQ, Vocab, Interf*nvIQ                                | -284.24        | 7        | -270.24          | ma2a-ma2b               | 1.14(1)        | 0.285       |
| ma2c             | Interf, nvIQ, Vocab, Interf*Vocab                               | -287.04        | 7        | -273.04          | ma2a-ma2c               | 3.94(1)        | 0.047       |
| ma3a             | Interf, nvIQ, Vocab, Interf*Vocab, SLI, TLD-L                   | -289.01        | 9        | -271.01          | ma2c-ma3a               | 1.97(2)        | 0.373       |
| <b>ma3c</b>      | <b>Interf, nvIQ, Vocab, Interf*Vocab, Interf*SLI</b>            | <b>-293.68</b> | <b>8</b> | <b>-277.68</b>   | <b>ma2c-ma3c</b>        | <b>6.64(1)</b> | <b>0.01</b> |
| ma3d             | Interf, nvIQ, Vocab, Interf*Vocab, Interf*SLI, Interf*TLD-L     | -293.72        | 9        | -275.72          | ma3c-ma3d               | 0.04(1)        | 0.842       |
| ma3e             | Interf, nvIQ, Vocab, Interf*Vocab, Interf*SLI, Interf*SLI*Vocab | -294.56        | 9        | -276.56          | ma3c-ma3e               | 0.88(1)        | 0.348       |

*Note.* Participants included as random effects in all models. N=66. Main effects of nonverbal IQ and Vocabulary were kept, regardless of significance level, in order to control for these covariates. <sup>a</sup>Likelihood-ratio test. <sup>b</sup>Akaike Information Criterion. <sup>c</sup>Comparison between current and best model built thus far. <sup>d</sup>Intraclass Correlation Coefficient (ICC) for the null model = .533.

Interf = interference condition; nvIQ = nonverbal IQ (TONI-3); Vocab = Vocabulary (EOWPVT); SLI = children with specific language impairment; TLD-L = language-matched typically developing children.

**Table s-5.** Interference effect: Results of linear mixed-effects model comparison for Reaction Time data. Best fitting model in bold.

| Model            | Fixed effects                                                              | Deviance      | df       | AIC <sup>b</sup> | LR test <sup>a</sup>    |                |              |
|------------------|----------------------------------------------------------------------------|---------------|----------|------------------|-------------------------|----------------|--------------|
|                  |                                                                            |               |          |                  | Comparison <sup>c</sup> | $\chi^2(df)$   | p            |
| mr0 <sup>d</sup> |                                                                            | 1797.9        | 3        | 1803.9           | –                       | –              | –            |
| mr1a             | Interf                                                                     | 1792.7        | 4        | 1800.7           | mr0-mr1a                | 5.19(1)        | 0.023        |
| mr2a             | Interf, nvIQ, Vocab                                                        | 1777.1        | 6        | 1789.1           | mr1a-mr2a               | 15.62(2)       | <.001        |
| mr2b             | Interf, nvIQ, Vocab, Interf*nvIQ                                           | 1775.3        | 7        | 1789.3           | mr2a-mr2b               | 1.79(1)        | 0.18         |
| mr2c             | Interf, nvIQ, Vocab, Interf*Vocab                                          | 1771.9        | 7        | 1785.9           | mr2a-mr2c               | 5.22(1)        | 0.022        |
| mr3a             | Interf, nvIQ, Vocab, Interf*Vocab, SLI                                     | 1770.6        | 8        | 1786.6           | mr2c-mr3a               | 1.31(1)        | 0.252        |
| <b>mr3b</b>      | <b>Interf, nvIQ, Vocab, Interf*Vocab, TLD-L</b>                            | <b>1761.9</b> | <b>8</b> | <b>1777.9</b>    | <b>mr2c-mr3b</b>        | <b>9.94(1)</b> | <b>0.002</b> |
| mr3c             | Interf, nvIQ, Vocab, Interf*Vocab, TLD-L, Interf*SLI                       | 1761.9        | 9        | 1779.9           | mr3b-mr3c               | 0.04(1)        | 0.84         |
| mr3d             | Interf, nvIQ, Vocab, Interf*Vocab, TLD-L, Interf*TLD-L                     | 1760.8        | 9        | 1778.8           | mr3b-mr3d               | 1.13(1)        | 0.288        |
| mr3e             | Interf, nvIQ, Vocab, Interf*Vocab, TLD-L, Interf*SLI, Interf*SLI*Vocab     | 1760.5        | 10       | 1780.5           | mr3b-mr3e               | 1.46(2)        | 0.482        |
| mr3f             | Interf, nvIQ, Vocab, Interf*Vocab, TLD-L, Interf*TLD-L, Interf*TLD-L*Vocab | 1760.6        | 10       | 1780.6           | mr3b-mr3f               | 1.33(2)        | 0.514        |

*Note.* Participants included as random effects in all models. N=66. Main effects of nonverbal IQ and Vocabulary were kept, regardless of significance level, in order to control for these covariates. <sup>a</sup>Likelihood-ratio test. <sup>b</sup>Akaike Information Criterion. <sup>c</sup>Comparison between current and best model built thus far. <sup>d</sup>Intraclass Correlation Coefficient (ICC) for the null model = .842. Interf = interference condition; nvIQ = nonverbal IQ (TONI-3); Vocab = Vocabulary (EOWPVT); SLI = children with specific language impairment; TLD-L = language-matched typically developing children.

**Table s-6.** Repeated presentation of items effect: Results of linear mixed-effects model comparison for performance accuracy. Best fitting model in bold.

| Model            | Fixed effects                                                              | Deviance      | df       | AIC <sup>b</sup> | LR test <sup>a</sup>    |                |              |
|------------------|----------------------------------------------------------------------------|---------------|----------|------------------|-------------------------|----------------|--------------|
|                  |                                                                            |               |          |                  | Comparison <sup>c</sup> | $\chi^2(df)$   | p            |
| ma0 <sup>d</sup> |                                                                            | -317.4        | 3        | -311.4           | –                       | –              | –            |
| ma1a             | rep                                                                        | -326.7        | 4        | -318.7           | ma0-ma1a                | 9.33(1)        | 0.002        |
| ma1b             | rep, rep2                                                                  | -331.5        | 5        | -321.5           | ma1a-ma1b               | 4.85(1)        | 0.028        |
| ma1c             | rep, rep2, Baseline                                                        | -336.2        | 6        | -324.2           | ma1b-ma1c               | 4.7(1)         | 0.03         |
| ma2a             | rep, rep2, Baseline, nvIQ, Vocab                                           | -349.3        | 8        | -333.3           | ma1c-ma2a               | 13.08(2)       | 0.001        |
| ma2b             | rep, rep2, Baseline, nvIQ, Vocab, rep*nvIQ                                 | -349.5        | 9        | -331.5           | ma2a-ma2b               | .16(1)         | 0.685        |
| ma2c             | rep, rep2, Baseline, nvIQ, Vocab, rep*nvIQ                                 | -349.4        | 9        | -331.4           | ma2a-ma2c               | .12(1)         | 0.73         |
| ma2bc            | rep, rep2, Baseline, nvIQ, Vocab, rep*nvIQ, rep2*nvIQ                      | -349.5        | 10       | -329.5           | ma2a-ma2bc              | .19(2)         | 0.91         |
| ma2d             | rep, rep2, Baseline, nvIQ, Vocab, rep*Vocab                                | -349.7        | 9        | -331.7           | ma2a-ma2d               | .37(1)         | 0.541        |
| ma2e             | rep, rep2, Baseline, nvIQ, Vocab, rep2*Vocab                               | -349.4        | 9        | -331.4           | ma2a-ma2e               | .1(1)          | 0.751        |
| ma2de            | rep, rep2, Baseline, nvIQ, Vocab, rep*Vocab, rep2*Vocab                    | -350.6        | 10       | -330.6           | ma2a-ma2de              | 1.26(2)        | 0.533        |
| ma3a             | rep, rep2, Baseline, nvIQ, Vocab, SLI                                      | -350.3        | 9        | -332.3           | ma2a-ma3a               | .97(1)         | 0.325        |
| ma3b             | rep, rep2, Baseline, nvIQ, Vocab, TLD-L                                    | -349.6        | 9        | -331.6           | ma2a-ma3b               | .28(1)         | 0.595        |
| ma3c             | rep, rep2, Baseline, nvIQ, Vocab, rep*SLI                                  | -349.8        | 9        | -331.8           | ma2a-ma3c               | .47(1)         | 0.49         |
| <b>ma3d</b>      | <b>rep, rep2, Baseline, nvIQ, Vocab, rep*SLI, rep2*SLI</b>                 | <b>-353.4</b> | <b>9</b> | <b>-335.4</b>    | <b>ma2a-ma3d</b>        | <b>4.07(1)</b> | <b>0.043</b> |
| ma3e             | rep, rep2, Baseline, nvIQ, Vocab, rep*SLI, rep2*SLI, rep*TLD-L             | -353.5        | 11       | -331.5           | ma3d-ma3e               | .06(2)         | 0.97         |
| ma3f             | rep, rep2, Baseline, nvIQ, Vocab, rep*SLI, rep2*SLI, rep*TLD-L, rep2*TLD-L | -354.8        | 12       | -330.8           | ma3d-ma3f               | 1.41(3)        | 0.704        |

*Note.* Participants included as random effects in all models. N=66. Main effects of nonverbal IQ and Vocabulary were kept, regardless of significance level, in order to control for these covariates. <sup>a</sup>Likelihood-ratio test. <sup>b</sup>Akaike Information Criterion. <sup>c</sup>Comparison between current and best model built thus far. <sup>d</sup>Intraclass Correlation Coefficient (ICC) for the null model = .419.

rep = repetition number (0-3); rep2 = repetition number squared (0-9); nvIQ = nonverbal IQ (TONI-3); Vocab = Vocabulary (EOWPVT); SLI = children with specific language impairment; Baseline = see text for description.



**Table s-7.** Repeated presentation of items effect: Results of linear mixed-effects model comparison for Reaction Time data. Best fitting model in bold.

| Model            | Fixed effects                         | Deviance      | df       | AIC <sup>b</sup> | LR test <sup>a</sup>    |                |              |
|------------------|---------------------------------------|---------------|----------|------------------|-------------------------|----------------|--------------|
|                  |                                       |               |          |                  | Comparison <sup>c</sup> | $\chi^2(df)$   | p            |
| mr0 <sup>d</sup> |                                       | 3604.2        | 3        | 3610.2           | –                       | –              | –            |
| mr1a             | rep                                   | 3593.8        | 4        | 3601.8           | mr0-mr1a                | 10.32(1)       | 0.001        |
| mr1b             | rep, rep2                             | 3593.3        | 5        | 3603.3           | mr1a-mr1b               | .5(1)          | 0.478        |
| mr1c             | rep, Baseline                         | 3568.3        | 5        | 3578.3           | mr1a-mr1c               | 25.51(1)       | <.001        |
| <b>mr2a</b>      | <b>rep, Baseline, nvIQ, Vocab</b>     | <b>3564.3</b> | <b>7</b> | <b>3578.3</b>    | <b>mr1c-mr2a</b>        | <b>4.02(2)</b> | <b>0.133</b> |
| mr2b             | rep, Baseline, nvIQ, Vocab, rep*nvIQ  | 3564.2        | 8        | 3580.2           | mr2a-mr2b               | .15(1)         | 0.701        |
| mr2d             | rep, Baseline, nvIQ, Vocab, rep*Vocab | 3563.2        | 8        | 3579.2           | mr2a-mr2d               | 1.09(1)        | 0.297        |
| mr3a             | rep, Baseline, nvIQ, Vocab, SLI       | 3563.5        | 8        | 3579.5           | mr2a-mr3a               | .8(1)          | 0.372        |
| mr3b             | rep, Baseline, nvIQ, Vocab, TLD-L     | 3564.2        | 8        | 3580.2           | mr2a-mr3b               | .11(1)         | 0.736        |
| mr3c             | rep, Baseline, nvIQ, Vocab, rep*SLI   | 3563.4        | 8        | 3579.4           | mr2a-mr3c               | .89(1)         | 0.346        |
| mr3e             | rep, Baseline, nvIQ, Vocab, rep*TLD-L | 3563.5        | 8        | 3579.5           | mr2a-mr3e               | .78(1)         | 0.376        |

*Note.* Participants included as random effects in all models. N=66. Main effects of nonverbal IQ and Vocabulary were kept, regardless of significance level, in order to control for these covariates. <sup>a</sup>Likelihood-ratio test. <sup>b</sup>Akaike Information Criterion. <sup>c</sup>Comparison between current and best model built thus far. <sup>d</sup>Intraclass Correlation Coefficient (ICC) for the null model = .53.

rep = repetition number (0-3); rep2 = repetition number squared (0-9); nvIQ = nonverbal IQ (TONI-3); Vocab = Vocabulary (EOWPVT); SLI = children with specific language impairment; Baseline = see text for description.

**Table s-8.** Effect of repetition benefit on post-repetition items: Results of linear mixed-effects model comparison for performance accuracy. Best fitting model in bold.

| Model            | Fixed effects                                                                                  | Deviance       | df        | AIC <sup>b</sup> | LR test <sup>a</sup>    |                |              |
|------------------|------------------------------------------------------------------------------------------------|----------------|-----------|------------------|-------------------------|----------------|--------------|
|                  |                                                                                                |                |           |                  | Comparison <sup>c</sup> | $\chi^2(df)$   | p            |
| ma0 <sup>d</sup> |                                                                                                | -243.42        | 3         | -237.42          | –                       | –              | –            |
| ma1a             | Baseline                                                                                       | -243.53        | 4         | -235.53          | ma0-ma1a                | .11(1)         | 0.745        |
| ma2a             | Baseline, repACC                                                                               | -243.98        | 5         | -233.98          | ma1a-ma2a               | .46(1)         | 0.498        |
| ma2b             | Baseline, repACC, repACC2                                                                      | -267.11        | 6         | -255.11          | ma1a-ma2b               | 23.58(2)       | <.001        |
| ma3a             | Baseline, repACC, repACC2, nvIQ, Vocab                                                         | -272.06        | 8         | -256.06          | ma2b-ma3a               | 4.95(2)        | 0.084        |
| ma3b             | Baseline, repACC, repACC2, nvIQ, Vocab, SLI                                                    | -283.26        | 9         | -265.26          | ma3a-ma3b               | 11.2(1)        | <.001        |
| ma3c             | Baseline, repACC, repACC2, nvIQ, Vocab, SLI, TLD-L                                             | -294.44        | 10        | -274.44          | ma3b-ma3c               | 11.18(1)       | <.001        |
| ma3d             | Baseline, repACC, repACC2, nvIQ, Vocab, SLI, TLD-L, SLI*repACC                                 | -296.22        | 11        | -274.22          | ma3c-ma3d               | 1.78(1)        | 0.181        |
| <b>ma3e</b>      | <b>Baseline, repACC, repACC2, nvIQ, Vocab, SLI, TLD-L, SLI* repACC2</b>                        | <b>-300.09</b> | <b>11</b> | <b>-278.09</b>   | <b>ma3c-ma3e</b>        | <b>5.65(1)</b> | <b>0.017</b> |
| ma3f             | Baseline, repACC, repACC2, nvIQ, Vocab, SLI, TLD-L, SLI*repACC, SLI* repACC2                   | -301.89        | 12        | -277.89          | ma3e-ma3f               | 1.81(1)        | 0.178        |
| ma4a             | Baseline, repACC, repACC2, nvIQ, Vocab, SLI, TLD-L, SLI* repACC2, TLD-L*repACC                 | -300.13        | 12        | -276.13          | ma3e-ma4a               | .04(1)         | 0.836        |
| ma4b             | Baseline, repACC, repACC2, nvIQ, Vocab, SLI, TLD-L, SLI* repACC2, TLD-L* repACC2               | -303.22        | 12        | -279.22          | ma3e-ma4b               | 3.13(1)        | 0.077        |
| ma4c             | Baseline, repACC, repACC2, nvIQ, Vocab, SLI, TLD-L, SLI* repACC2, TLD-L*repACC, TLD-L* repACC2 | -303.51        | 13        | -277.51          | ma3e-ma4c               | 3.43(2)        | 0.18         |

*Note.* Participants included as random effects in all models. N=66. Main effects of nonverbal IQ and Vocabulary were kept, regardless of significance level, in order to control for these covariates. <sup>a</sup>Likelihood-ratio test. <sup>b</sup>Akaike Information Criterion. <sup>c</sup>Comparison between current and best model built thus far. <sup>d</sup>Intraclass Correlation Coefficient (ICC) for the null model = .332. repACC = repetition benefit; repACC2 = repetition benefit squared; nvIQ = nonverbal IQ (TONI-3); Vocab = Vocabulary (EOWPVT); SLI = children with specific language impairment; TLD-L = language-matched typically developing children; Baseline = see text for description.

**Table s-9.** Effect of repetition benefit on post-repetition items: Results of linear mixed-effects model comparison for Reaction Time data. Best fitting model in bold.

| Model            | Fixed effects                                                                          | Deviance      | df        | AIC <sup>b</sup> | LR test <sup>a</sup>    |                |              |
|------------------|----------------------------------------------------------------------------------------|---------------|-----------|------------------|-------------------------|----------------|--------------|
|                  |                                                                                        |               |           |                  | Comparison <sup>c</sup> | $\chi^2(df)$   | p            |
| mr0 <sup>d</sup> |                                                                                        | 3635.3        | 3         | 3641.3           | –                       | –              | –            |
| mr1              | Baseline                                                                               | 3633.6        | 4         | 3641.6           | mr0-mr1                 | 1.7(1)         | 0.191        |
| mr2a             | Baseline, repRT                                                                        | 3624.3        | 5         | 3634.3           | mr1-mr2a                | 9.27(1)        | 0.002        |
| mr2b             | Baseline, repRT, repRT2                                                                | 3624          | 6         | 3636             | mr2a-mr2b               | .25(1)         | 0.617        |
| mr3a             | Baseline, repRT, repRT2, nvIQ, Vocab                                                   | 3623.6        | 8         | 3639.6           | mr2b-mr3a               | .41(2)         | 0.815        |
| mr3b             | Baseline, repRT, repRT2, nvIQ, Vocab, SLI                                              | 3621.9        | 9         | 3639.9           | mr3a-mr3b               | 1.75(1)        | 0.186        |
| mr3c             | Baseline, repRT, repRT2, nvIQ, Vocab, TLD-L                                            | 3623.5        | 9         | 3641.5           | mr3a-mr3c               | .08(1)         | 0.774        |
| mr3d             | Baseline, repRT, repRT2, nvIQ, Vocab, SLI*repRT                                        | 3622.4        | 9         | 3640.4           | mr3a-mr3d               | 1.25(1)        | 0.263        |
| mr3d2            | Baseline, repRT, repRT2, nvIQ, Vocab, SLI*repRT2                                       | 3615.9        | 9         | 3633.9           | mr3a-mr3d2              | 7.77(1)        | 0.005        |
| mr3d3            | Baseline, repRT, repRT2, nvIQ, Vocab, SLI*repRT, SLI*repRT2                            | 3613.6        | 10        | 3633.6           | mr3a-mr3d3              | 9.99(2)        | 0.006        |
| mr3e             | Baseline, repRT, repRT2, nvIQ, Vocab, SLI*repRT, SLI*repRT2, TLD-L*repRT               | 3613.6        | 11        | 3635.6           | mr3d3-mr3e              | .03(1)         | 0.854        |
| <b>mr3e2</b>     | <b>Baseline, repRT, repRT2, nvIQ, Vocab, SLI*repRT, SLI*repRT2, TLD-L*repRT2</b>       | <b>3609.2</b> | <b>11</b> | <b>3631.2</b>    | <b>mr3d3-mr3e2</b>      | <b>4.49(1)</b> | <b>0.034</b> |
| mr3e3            | Baseline, repRT, repRT2, nvIQ, Vocab, SLI*repRT, SLI*repRT2, TLD-L*repRT, TLD-L*repRT2 | 3606.5        | 12        | 3630.5           | mr3e2-mr3e3             | 2.61(1)        | 0.106        |

*Note.* Participants included as random effects in all models. N=66. Main effects of nonverbal IQ and Vocabulary were kept, regardless of significance level, in order to control for these covariates. <sup>a</sup>Likelihood-ratio test. <sup>b</sup>Akaike Information Criterion. <sup>c</sup>Comparison between current and best model built thus far. <sup>d</sup>Intraclass Correlation Coefficient (ICC) for the null model = .226. repRT = repetition benefit; repRT2 = repetition benefit squared; nvIQ = nonverbal IQ (TONI-3); Vocab = Vocabulary (EOWPVT); SLI = children with specific language impairment; TLD-L = language-matched typically developing children; Baseline = see text for description.
